# Supplementary material
Source: Springer Nature journal article supplement (https://www.springermedizin.de/resource/supplementary/12985_2010_859_MOESM1_ESM.pdf/9608606)

A

RSV-X

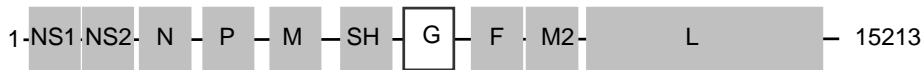

*Sex A I Xma I*  
(1246) (2467)

*BssH II*  
(4800)

*BsiW I*  
(5730)

*Mlu I*  
(8587)

rRSV

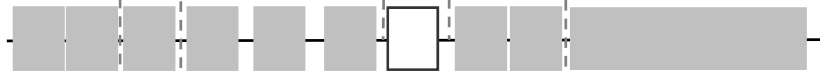 $\Delta$ G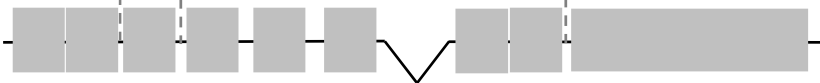

B

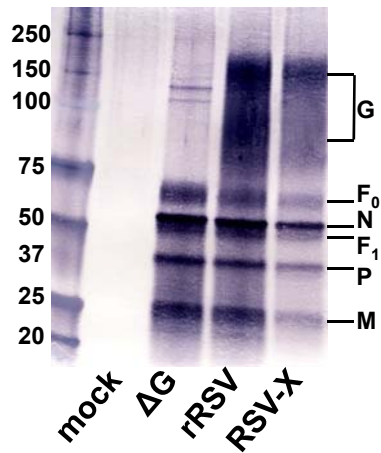

Supplement: MOESM1 [file 9608606]
